# Supplementary material for: Integrative transcriptome analysis reveals dysregulation of canonical cancer molecular pathways in placenta leading to preeclampsia
Source: PubMed Central journal article supplement — Sci Rep. 2013 Aug 30;3:2407. doi: 10.1038/srep02407 (PMC3757356; doi:10.1038/srep02407), 2013-08-30

**Integrative transcriptome analysis reveals dysregulation of canonical cancer molecular pathways in placenta leading to preeclampsia**

**Roxana Moslehi, James L Mills, Caroline Signore, Anil Kumar, Xavier Ambroggio and Amiran Dzutsev**

**Figure S1. Study Design Flow Chart**

Our integrative analysis involved interrogating a preeclampsia-specific gene list obtained from meta-analysis of case-control studies in several relevant data sources, which included expression arrays of normal and time-course placentas (i.e., placenta from first, second and third trimester pregnancies), hypoxic trophoblasts, and *XPD*<sup>TTD</sup> fibroblasts (i.e., cells predisposed to preeclampsia). These data sources were specifically chosen in order to filter the differentially-expressed genes and pathways to select those which preceded the development of the clinical symptoms of preeclampsia.

**Figure S2. Protein-level expression of selected preeclampsia genes in normal placenta**

Protein level expression analysis of selected genes found to be differentially-expressed in preeclamptic placentas from meta-analysis of preeclampsia case-control studies, using a protein atlas database ([proteinatlas.org](http://proteinatlas.org)). Selected genes included secreted factors (FLT1, LEP, CRH, GH1), membrane-bound molecules (ENG, ADAM12, EGFR), nuclear (ATF3) and stromal (FBN2) proteins. Localization of all examined proteins was noted in trophoblasts except for FBN2, which was found expressed in extracellular matrix.

**Figure S3. Comparison of preeclampsia gene signature with that of cells treated with shATF3.**

**Panel a.** Venn diagram showing shared genes between preeclampsia and ATF3 deficient cells (shATF3).

**Panel b.** Heatmap showing fold changes in the respective datasets of common genes identified in **Panel**

**a.** Red arrows show that FLT1, ENG and INHBA are downregulated after treatment of K562 cells with

shATF3. **Panel c.** Visualization of ATF3 binding to promoter region (approximately 1kb from transcription

start site of Flt1 gene) in mouse dendritic cells(GSM881126<sup>31</sup>).

Figure S1

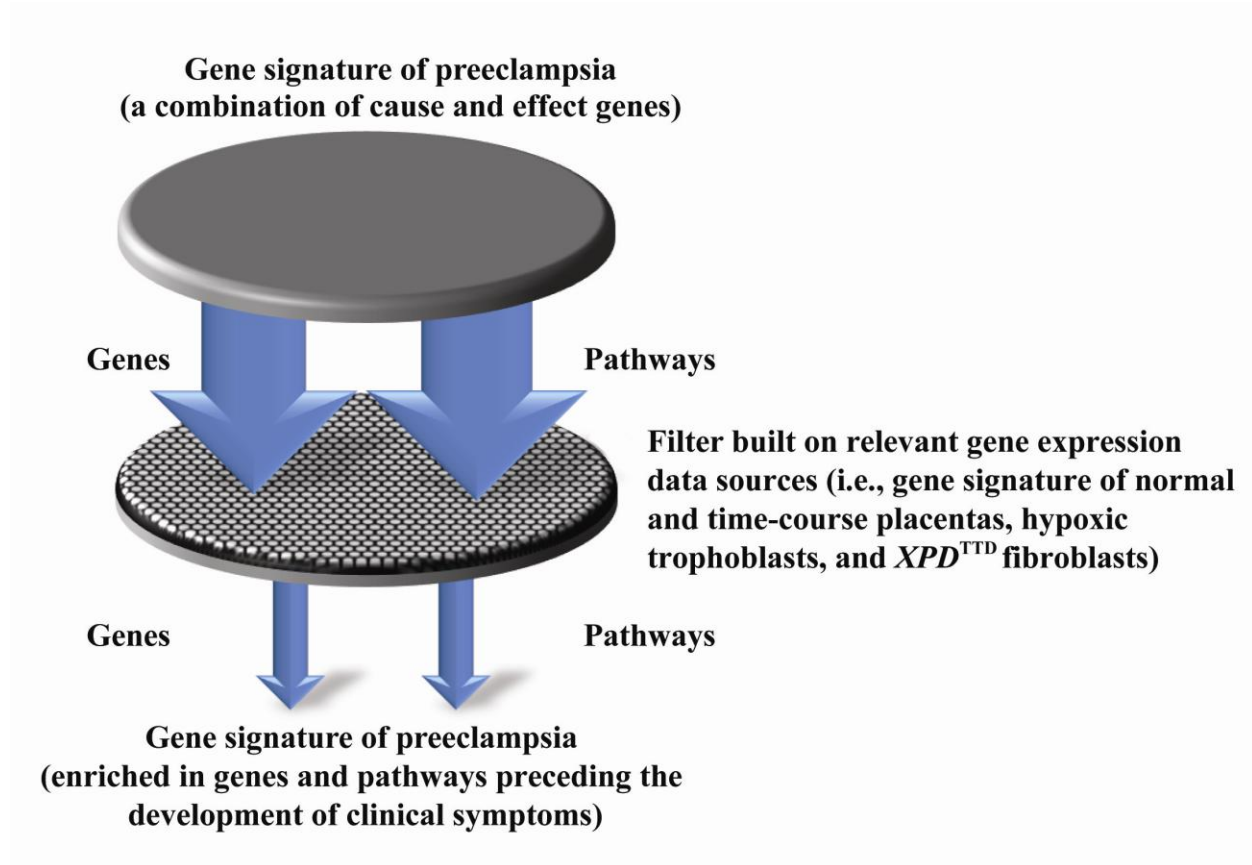

Figure S2

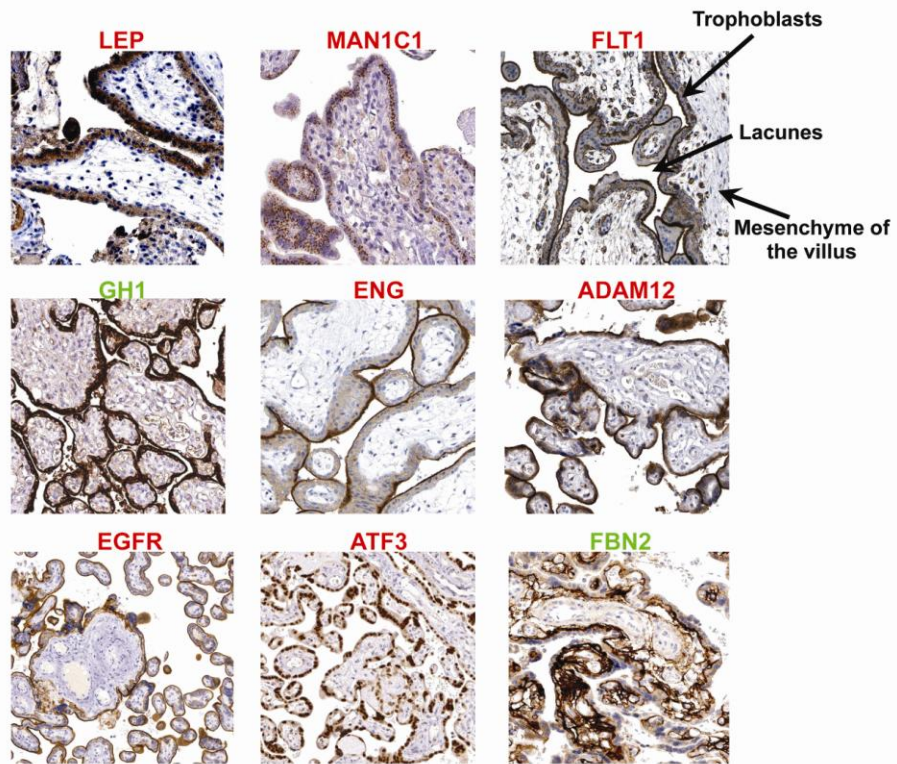

Figure S3

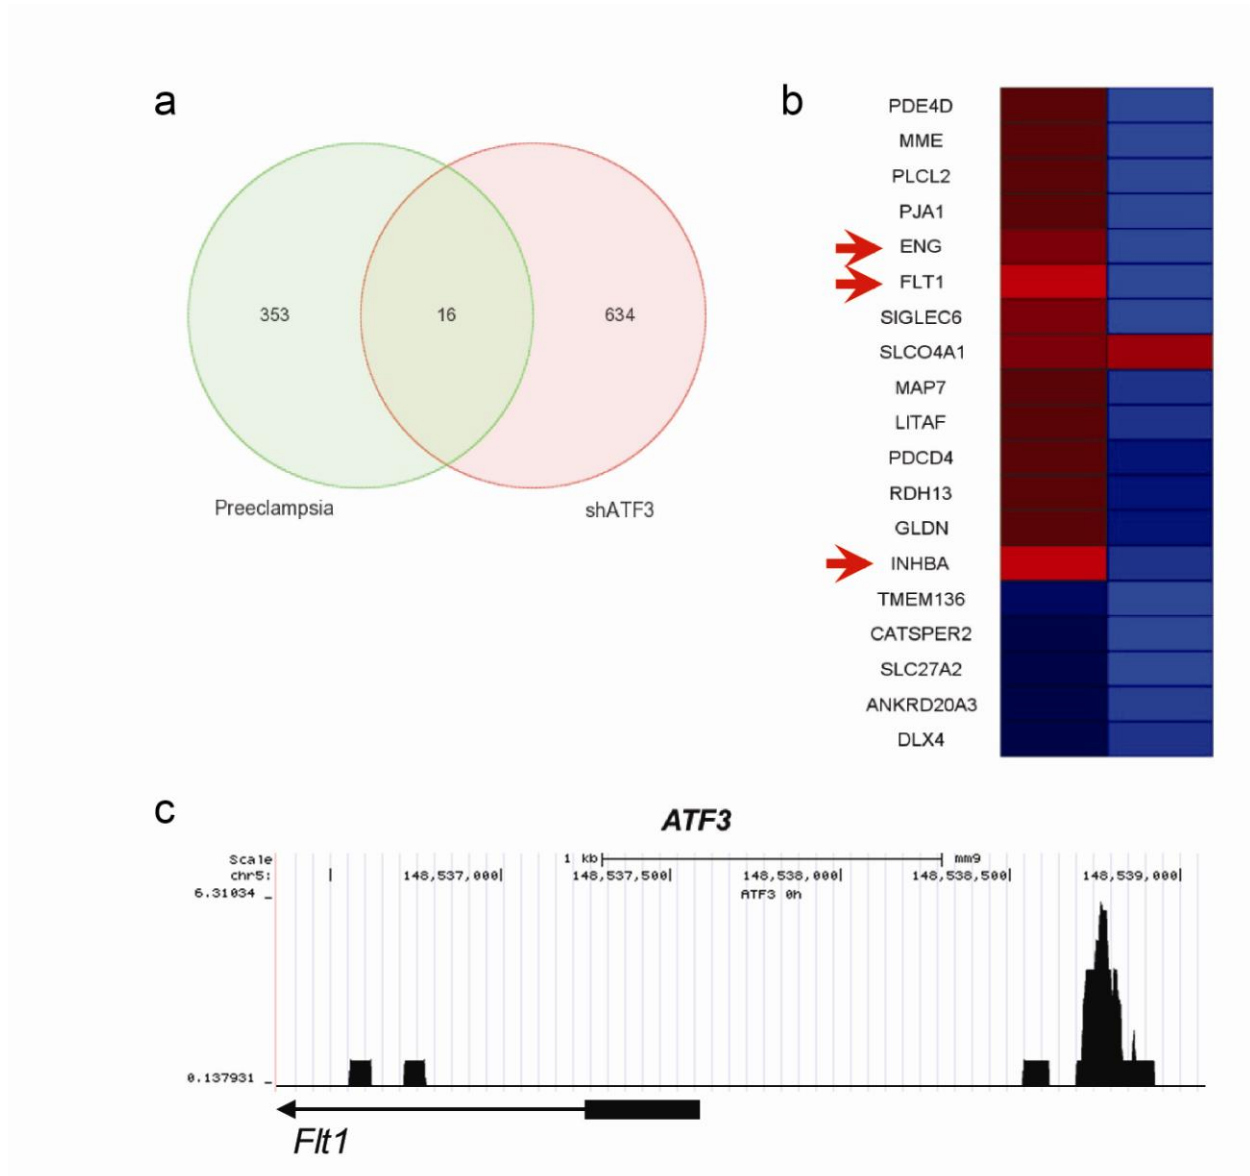

Supplement: srep02407-s1.pdf [file srep02407-s1.pdf]
