# Supplementary material for: Integrative transcriptome analysis reveals dysregulation of canonical cancer molecular pathways in placenta leading to preeclampsia
Source: PubMed Central journal article supplement — Sci Rep. 2013 Aug 30;3:2407. doi: 10.1038/srep02407 (PMC3757356; doi:10.1038/srep02407), 2013-08-30
Supplement: srep02407-s2.pdf [file srep02407-s2.pdf]

Table S1: Differentially-regulated genes in preeclampsia meta-analysis

| Gene symbol | Entrez Gene Name                                                                                         | Location            | Type(s)               | Average Fold | P value  |
|-------------|----------------------------------------------------------------------------------------------------------|---------------------|-----------------------|--------------|----------|
| LEP         | leptin                                                                                                   | Extracellular Space | growth factor         | 19.69        | 6.05E-28 |
| CRH         | corticotropin releasing hormone                                                                          | Extracellular Space | other                 | 4.86         | 2.35E-14 |
| HTRA4       | HtrA serine peptidase 4                                                                                  | unknown             | other                 | 4.15         | 5.60E-08 |
| CGB         | chorionic gonadotropin, beta polypeptide                                                                 | Extracellular Space | other                 | 4.25         | 1.45E-03 |
| FLT1        | fms-related tyrosine kinase 1 (vascular endothelial growth factor/vascular permeability factor receptor) | Plasma Membrane     | kinase                | 3.91         | 3.01E-12 |
| INHBA       | inhibin, beta A                                                                                          | Extracellular Space | growth factor         | 3.61         | 8.60E-12 |
| NTRK2       | neurotrophic tyrosine kinase, receptor, type 2                                                           | Plasma Membrane     | kinase                | 3.28         | 8.94E-08 |
| FSTL3       | follistatin-like 3 (secreted glycoprotein)                                                               | Extracellular Space | other                 | 3.17         | 5.75E-10 |
| DERL3       | derlin 3                                                                                                 | Cytoplasm           | other                 | 2.90         | 3.51E-06 |
| HK2         | hexokinase 2                                                                                             | Cytoplasm           | kinase                | 2.50         | 2.02E-07 |
| AQP1        | aquaporin 1 (Colton blood group)                                                                         | Plasma Membrane     | transporter           | 2.49         | 3.77E-05 |
| BTNL9       | butyrophilin-like 9                                                                                      | unknown             | other                 | 2.46         | 2.83E-05 |
| PSG9        | pregnancy specific beta-1-glycoprotein 9                                                                 | Extracellular Space | other                 | 2.45         | 5.29E-07 |
| ADAM2       | ADAM metallopeptidase domain 2                                                                           | Plasma Membrane     | peptidase             | 2.42         | 1.14E-03 |
| LHB         | luteinizing hormone beta polypeptide                                                                     | Extracellular Space | other                 | 2.37         | 8.65E-05 |
| HMHA1       | histocompatibility (minor) HA-1                                                                          | Cytoplasm           | transporter           | 2.37         | 7.53E-05 |
| PAPPA2      | pappalysin 2                                                                                             | Extracellular Space | peptidase             | 2.36         | 4.90E-08 |
| INHA        | inhibin, alpha                                                                                           | Extracellular Space | growth factor         | 2.34         | 9.41E-08 |
| FABP4       | fatty acid binding protein 4, adipocyte                                                                  | Cytoplasm           | transporter           | 2.32         | 1.38E-04 |
| SLCO4A1     | solute carrier organic anion transporter family, member 4A1                                              | Plasma Membrane     | transporter           | 2.29         | 7.54E-05 |
| ANKRD37     | ankyrin repeat domain 37                                                                                 | unknown             | other                 | 2.24         | 4.00E-03 |
| PVRL4       | poliovirus receptor-related 4                                                                            | Plasma Membrane     | other                 | 2.22         | 8.86E-05 |
| CCNT1       | cyclin T1                                                                                                | Nucleus             | transcription regulat | 2.18         | 4.41E-03 |
| BHLHE40     | basic helix-loop-helix family, member e40                                                                | Nucleus             | transcription regulat | 2.16         | 1.64E-02 |
| MUC1        | mucin 1, cell surface associated                                                                         | Plasma Membrane     | transcription regulat | 2.13         | 7.05E-04 |
| GBA         | glucosidase, beta, acid                                                                                  | Cytoplasm           | enzyme                | 2.13         | 4.01E-04 |
| TREM1       | triggering receptor expressed on myeloid cells 1                                                         | Plasma Membrane     | other                 | 2.12         | 2.09E-05 |

|          |                                                                          |                     |                         |      |          |
|----------|--------------------------------------------------------------------------|---------------------|-------------------------|------|----------|
| PIK3R3   | phosphoinositide-3-kinase, regulatory subunit 3 (gamma)                  | Cytoplasm           | kinase                  | 2.10 | 1.29E-03 |
| BCL6     | B-cell CLL/lymphoma 6                                                    | Nucleus             | transcription regulator | 2.10 | 1.85E-04 |
| ARRDC3   | arrestin domain containing 3                                             | Plasma Membrane     | other                   | 2.06 | 3.94E-04 |
| SIGLEC6  | sialic acid binding Ig-like lectin 6                                     | Extracellular Space | other                   | 2.05 | 1.24E-06 |
| RRM2     | ribonucleotide reductase M2                                              | Nucleus             | enzyme                  | 2.05 | 4.55E-02 |
| DUSP1    | dual specificity phosphatase 1                                           | Nucleus             | phosphatase             | 2.04 | 4.47E-06 |
| SERPINA3 | serpin peptidase inhibitor, clade A (alpha-1 antitrypsin), member 3      | Extracellular Space | other                   | 2.02 | 6.76E-03 |
| ENG      | endoglin                                                                 | Plasma Membrane     | transmembrane receptor  | 2.02 | 1.56E-06 |
| EBI3     | Epstein-Barr virus induced 3                                             | Extracellular Space | cytokine                | 1.99 | 3.43E-06 |
| SH3BP5   | SH3-domain binding protein 5 (BTK-associated)                            | Cytoplasm           | other                   | 1.99 | 2.51E-06 |
| KIAA1199 | KIAA1199                                                                 | Cytoplasm           | other                   | 1.98 | 7.76E-04 |
| GREM2    | gremlin 2                                                                | Extracellular Space | other                   | 1.97 | 6.70E-06 |
| NNAT     | neuronatin                                                               | Plasma Membrane     | transporter             | 1.97 | 1.41E-03 |
| DNAH11   | dynein, axonemal, heavy chain 11                                         | Cytoplasm           | enzyme                  | 1.96 | 1.61E-03 |
| PREX1    | phosphatidylinositol-3,4,5-trisphosphate-dependent Rac exchange factor 1 | Cytoplasm           | other                   | 1.96 | 1.41E-02 |
| PSG11    | pregnancy specific beta-1-glycoprotein 11                                | Extracellular Space | other                   | 1.96 | 7.01E-04 |
| HTRA1    | HtrA serine peptidase 1                                                  | Extracellular Space | peptidase               | 1.95 | 3.95E-06 |
| ATF3     | activating transcription factor 3                                        | Nucleus             | transcription regulator | 1.95 | 2.95E-02 |
| PROCR    | protein C receptor, endothelial                                          | Plasma Membrane     | other                   | 1.92 | 9.81E-06 |
| RASEF    | RAS and EF-hand domain containing                                        | unknown             | other                   | 1.91 | 1.56E-03 |
| HEXB     | hexosaminidase B (beta polypeptide)                                      | Cytoplasm           | enzyme                  | 1.91 | 1.06E-03 |
| LRTM2    | leucine-rich repeats and transmembrane domains 2                         | unknown             | other                   | 1.91 | 1.18E-02 |
| NEK11    | NIMA (never in mitosis gene a)- related kinase 11                        | Nucleus             | kinase                  | 1.90 | 4.66E-05 |
| NDRG1    | N-myc downstream regulated 1                                             | Nucleus             | kinase                  | 1.89 | 8.59E-06 |
| PSG8     | pregnancy specific beta-1-glycoprotein 8                                 | unknown             | other                   | 1.89 | 2.32E-03 |
| ERRF1    | ERBB receptor feedback inhibitor 1                                       | Cytoplasm           | other                   | 1.89 | 8.82E-04 |
| CAPN11   | calpain 11                                                               | Cytoplasm           | peptidase               | 1.89 | 4.95E-03 |
| SYT16    | synaptotagmin XVI                                                        | unknown             | transporter             | 1.88 | 3.25E-02 |

|          |                                                                            |                     |                       |      |          |
|----------|----------------------------------------------------------------------------|---------------------|-----------------------|------|----------|
| SPTLC3   | serine palmitoyltransferase, long chain base subunit 3                     | Cytoplasm           | enzyme                | 1.73 | 2.77E-02 |
| MYO7B    | myosin VIIb                                                                | unknown             | peptidase             | 1.87 | 4.74E-03 |
| PPL      | periplakin                                                                 | Cytoplasm           | other                 | 1.86 | 4.03E-03 |
| CBLC     | Cbl proto-oncogene, E3 ubiquitin protein ligase C                          | Nucleus             | enzyme                | 1.86 | 2.24E-02 |
| KIAA1984 | KIAA1984                                                                   | unknown             | other                 | 1.86 | 2.08E-03 |
| KIF2A    | kinesin heavy chain member 2A                                              | Cytoplasm           | other                 | 1.79 | 2.56E-02 |
| TGFB1    | transforming growth factor, beta 1                                         | Extracellular Space | growth factor         | 1.85 | 1.14E-05 |
| ING1     | inhibitor of growth family, member 1                                       | Nucleus             | transcription regulat | 1.85 | 4.38E-02 |
| RNF2     | ring finger protein 2                                                      | Nucleus             | transcription regulat | 1.85 | 2.82E-02 |
| SLC6A8   | solute carrier family 6 (neurotransmitter transporter, creatine), member 8 | Cytoplasm           | transporter           | 1.85 | 1.18E-03 |
| PSG1     | pregnancy specific beta-1-glycoprotein 1                                   | Extracellular Space | other                 | 1.84 | 4.84E-03 |
| NRIP1    | nuclear receptor interacting protein 1                                     | Nucleus             | transcription regulat | 1.84 | 1.42E-03 |
| C1orf96  | chromosome 1 open reading frame 96                                         | Cytoplasm           | other                 | 1.82 | 1.34E-03 |
| SPAG4    | sperm associated antigen 4                                                 | Cytoplasm           | other                 | 1.82 | 2.54E-05 |
| FLNB     | filamin B, beta                                                            | Cytoplasm           | other                 | 1.81 | 4.85E-02 |
| NUCB2    | nucleobindin 2                                                             | Nucleus             | other                 | 1.80 | 8.17E-03 |
| ZNF114   | zinc finger protein 114                                                    | unknown             | other                 | 1.80 | 4.36E-03 |
| C1orf21  | chromosome 1 open reading frame 21                                         | unknown             | other                 | 1.79 | 3.21E-03 |
| LIMCH1   | LIM and calponin homology domains 1                                        | unknown             | other                 | 1.78 | 1.74E-03 |
| CST6     | cystatin E/M                                                               | Extracellular Space | other                 | 1.78 | 1.68E-02 |
| GPT2     | glutamic pyruvate transaminase (alanine aminotransferase) 2                | Cytoplasm           | enzyme                | 1.76 | 2.49E-03 |
| SASH1    | SAM and SH3 domain containing 1                                            | Extracellular Space | other                 | 1.75 | 2.88E-05 |
| KRT19    | keratin 19                                                                 | Cytoplasm           | other                 | 1.75 | 5.60E-05 |
| ADAM9    | ADAM metallopeptidase domain 9                                             | Plasma Membrane     | peptidase             | 1.75 | 2.57E-03 |
| SH3PXD2A | SH3 and PX domains 2A                                                      | Cytoplasm           | other                 | 1.75 | 4.79E-03 |
| OSMR     | oncostatin M receptor                                                      | Plasma Membrane     | plasmembrane recep    | 1.73 | 2.90E-03 |
| CFB      | complement factor B                                                        | Extracellular Space | peptidase             | 1.72 | 5.68E-03 |
| BIN2     | bridging integrator 2                                                      | unknown             | other                 | 1.71 | 3.63E-03 |
| PIK3CB   | phosphoinositide-3-kinase, catalytic, beta polypeptide                     | Cytoplasm           | kinase                | 1.71 | 2.44E-03 |

|          |                                                                                         |                 |                          |      |          |
|----------|-----------------------------------------------------------------------------------------|-----------------|--------------------------|------|----------|
| SLCO2A1  | solute carrier organic anion transporter family, member 2A1                             | Plasma Membrane | transporter              | 1.71 | 5.43E-05 |
| SLC6A10P | solute carrier family 6 (neurotransmitter transporter, creatine), member 10, pseudogene | Plasma Membrane | transporter              | 1.70 | 4.42E-03 |
| SLC16A3  | solute carrier family 16, member 3 (monocarboxylic acid transporter 4)                  | Plasma Membrane | transporter              | 1.70 | 9.62E-05 |
| LRRC1    | leucine rich repeat containing 1                                                        | Cytoplasm       | other                    | 1.69 | 8.32E-05 |
| KIT      | v-kit Hardy-Zuckerman 4 feline sarcoma viral oncogene homolog                           | Plasma Membrane | kinase                   | 1.69 | 7.32E-03 |
| QPCT     | glutaminyl-peptide cyclotransferase                                                     | Cytoplasm       | enzyme                   | 1.68 | 1.35E-04 |
| ATAD3B   | ATPase family, AAA domain containing 3A                                                 | Nucleus         | other                    | 1.68 | 9.48E-03 |
| GLDN     | gliomedin                                                                               | Cytoplasm       | other                    | 1.68 | 3.10E-02 |
| PDCD4    | programmed cell death 4 (neoplastic transformation inhibitor)                           | Nucleus         | other                    | 1.67 | 8.20E-03 |
| CDKN1B   | cyclin-dependent kinase inhibitor 1B (p27, Kip1)                                        | Nucleus         | kinase                   | 1.67 | 6.17E-03 |
| CBLB     | Cbl proto-oncogene, E3 ubiquitin protein ligase B                                       | Nucleus         | other                    | 1.67 | 4.34E-03 |
| MFSD4    | major facilitator superfamily domain containing 4                                       | unknown         | other                    | 1.66 | 7.10E-03 |
| EPS8L1   | EPS8-like 1                                                                             | unknown         | other                    | 1.66 | 4.73E-03 |
| C7orf68  | hypoxia inducible lipid droplet-associated                                              | Cytoplasm       | other                    | 1.65 | 5.99E-03 |
| SCARB1   | scavenger receptor class B, member 1                                                    | Plasma Membrane | transporter              | 1.65 | 1.11E-04 |
| KLF4     | Kruppel-like factor 4 (gut)                                                             | Nucleus         | transcription regulator  | 1.65 | 5.26E-03 |
| IL1RAP   | interleukin 1 receptor accessory protein                                                | Plasma Membrane | plasma membrane receptor | 1.63 | 2.14E-04 |
| PLA2G16  | phospholipase A2, group XVI                                                             | Nucleus         | enzyme                   | 1.63 | 5.67E-03 |
| LYN      | v-src-1 Yamaguchi sarcoma viral related oncogene homolog                                | Cytoplasm       | kinase                   | 1.63 | 2.04E-04 |
| TPBG     | trophoblast glycoprotein                                                                | Plasma Membrane | other                    | 1.63 | 2.05E-04 |
| ZNF44    | zinc finger protein 44                                                                  | Nucleus         | other                    | 1.63 | 2.96E-02 |
| PLCL2    | phospholipase C-like 2                                                                  | Cytoplasm       | enzyme                   | 1.62 | 2.77E-04 |
| BACH1    | BTB and CNC homology 1, basic leucine zipper transcription factor 1                     | Nucleus         | transcription regulator  | 1.62 | 4.04E-04 |

|          |                                                          |                     |                          |      |          |
|----------|----------------------------------------------------------|---------------------|--------------------------|------|----------|
| LDHA     | lactate dehydrogenase A                                  | Cytoplasm           | enzyme                   | 1.62 | 2.00E-02 |
| INSIG1   | insulin induced gene 1                                   | Cytoplasm           | other                    | 1.61 | 9.56E-04 |
| PDLIM2   | PDZ and LIM domain 2 (mystique)                          | Cytoplasm           | other                    | 1.61 | 2.78E-03 |
| VWF      | von Willebrand factor                                    | Extracellular Space | other                    | 1.61 | 1.14E-02 |
| PHYHIP   | phytanoyl-CoA 2-hydroxylase interacting protein          | unknown             | other                    | 1.60 | 3.63E-02 |
| LONRF1   | LON peptidase N-terminal domain and ring finger 1        | unknown             | other                    | 1.60 | 1.39E-02 |
| FLT4     | fms-related tyrosine kinase 4                            | Plasma Membrane     | plasma membrane receptor | 1.60 | 1.07E-02 |
| DDR1     | discoidin domain receptor tyrosine kinase 1              | Plasma Membrane     | kinase                   | 1.60 | 4.78E-04 |
| ZCCHC2   | zinc finger, CCHC domain containing 2                    | Cytoplasm           | other                    | 1.60 | 8.87E-03 |
| PPP1R3B  | protein phosphatase 1, regulatory subunit 3B             | Cytoplasm           | other                    | 1.60 | 1.10E-02 |
| GDF10    | growth differentiation factor 10                         | Extracellular Space | growth factor            | 1.59 | 3.80E-02 |
| CRIP2    | cysteine-rich protein 2                                  | Plasma Membrane     | other                    | 1.59 | 1.05E-03 |
| CYP2J2   | cytochrome P450, family 2, subfamily J, polypeptide 2    | Cytoplasm           | enzyme                   | 1.59 | 2.76E-04 |
| KIAA1217 | KIAA1217                                                 | Cytoplasm           | other                    | 1.59 | 4.91E-02 |
| TCF19    | transcription factor 19                                  | Nucleus             | transcription regulator  | 1.59 | 1.25E-02 |
| PIK3AP1  | phosphoinositide-3-kinase adaptor protein 1              | Cytoplasm           | other                    | 1.58 | 1.43E-02 |
| SRI      | sorcini                                                  | Cytoplasm           | transporter              | 1.58 | 5.70E-04 |
| DLX5     | distal-less homeobox 5                                   | Nucleus             | transcription regulator  | 1.58 | 9.25E-04 |
| ABCA1    | ATP-binding cassette, sub-family A (ABC1), member 1      | Plasma Membrane     | transporter              | 1.58 | 3.51E-03 |
| PLXNC1   | plexin C1                                                | Plasma Membrane     | other                    | 1.58 | 1.98E-02 |
| CALM1    | calmodulin 1 (phosphorylase kinase, delta)               | unknown             | other                    | 1.57 | 3.07E-04 |
| PPME1    | protein phosphatase methylesterase 1                     | unknown             | enzyme                   | 1.57 | 3.19E-02 |
| EFHD1    | EF-hand domain family, member D1                         | Cytoplasm           | other                    | 1.57 | 3.72E-04 |
| GLRX     | glutaredoxin (thioltransferase)                          | Cytoplasm           | enzyme                   | 1.56 | 4.73E-04 |
| DPY19L4  | dpy-19-like 4 (C. elegans)                               | unknown             | other                    | 1.56 | 1.96E-02 |
| STEAP4   | STEAP family member 4                                    | Plasma Membrane     | other                    | 1.56 | 1.16E-02 |
| CGA      | glycoprotein hormones, alpha polypeptide                 | Extracellular Space | other                    | 1.56 | 1.32E-03 |
| JUNB     | jun B proto-oncogene                                     | Nucleus             | transcription regulator  | 1.56 | 4.13E-04 |
| LTBP1    | latent transforming growth factor beta binding protein 1 | Extracellular Space | other                    | 1.56 | 1.16E-02 |

|         |                                                                          |                     |                          |      |          |
|---------|--------------------------------------------------------------------------|---------------------|--------------------------|------|----------|
| SLC2A1  | solute carrier family 2 (facilitated glucose transporter), member 1      | Plasma Membrane     | transporter              | 1.55 | 5.35E-04 |
| RDH13   | retinol dehydrogenase 13 (all-trans/9-cis)                               | Cytoplasm           | enzyme                   | 1.55 | 1.35E-02 |
| MIF     | macrophage migration inhibitory factor (glycosylation-inhibiting factor) | Extracellular Space | cytokine                 | 1.55 | 4.54E-04 |
| SIPA1L1 | signal-induced proliferation-associated 1 like 1                         | Cytoplasm           | other                    | 1.55 | 1.52E-02 |
| GPNMB   | glycoprotein (transmembrane) nmb                                         | Plasma Membrane     | enzyme                   | 1.55 | 1.89E-02 |
| MME     | membrane metallo-endopeptidase                                           | Plasma Membrane     | peptidase                | 1.55 | 4.32E-03 |
| POR     | P450 (cytochrome) oxidoreductase                                         | Cytoplasm           | enzyme                   | 1.54 | 4.83E-02 |
| TRIM24  | tripartite motif containing 24                                           | Nucleus             | transcription regulator  | 1.54 | 4.75E-04 |
| ADRB2   | adrenoceptor beta 2, surface                                             | Plasma Membrane     | protein coupled receptor | 1.54 | 1.95E-02 |
| MAN1C1  | mannosidase, alpha, class 1C, member 1                                   | Cytoplasm           | enzyme                   | 1.54 | 8.30E-04 |
| ALDOA   | aldolase A, fructose-bisphosphate                                        | Cytoplasm           | enzyme                   | 1.54 | 1.91E-02 |
| SSFA2   | sperm specific antigen 2                                                 | Plasma Membrane     | other                    | 1.54 | 5.15E-04 |
| MAFF    | v-maf musculoaponeurotic fibrosarcoma oncogene homolog F (avian)         | Nucleus             | transcription regulator  | 1.54 | 9.33E-04 |
| ADAM12  | ADAM metallopeptidase domain 12                                          | Plasma Membrane     | peptidase                | 1.54 | 9.18E-04 |
| ITPR3   | inositol 1,4,5-trisphosphate receptor, type 3                            | Cytoplasm           | ion channel              | 1.53 | 4.61E-02 |
| KDM3A   | lysine (K)-specific demethylase 3A                                       | Nucleus             | other                    | 1.53 | 2.03E-02 |
| MTMR4   | myotubularin related protein 4                                           | Cytoplasm           | phosphatase              | 1.53 | 6.61E-04 |
| SLC39A8 | solute carrier family 39 (zinc transporter), member 8                    | Extracellular Space | transporter              | 1.53 | 9.20E-03 |
| ASTE1   | asteroid homolog 1 (Drosophila)                                          | unknown             | other                    | 1.53 | 1.02E-03 |
| DNAJC3  | DnaJ (Hsp40) homolog, subfamily C, member 3                              | Cytoplasm           | other                    | 1.53 | 3.62E-02 |
| INSL4   | insulin-like 4 (placenta)                                                | Extracellular Space | other                    | 1.52 | 2.91E-02 |
| HPCAL1  | hippocalcin-like 1                                                       | Cytoplasm           | other                    | 1.52 | 3.33E-02 |
| CCDC47  | coiled-coil domain containing 47                                         | Extracellular Space | other                    | 1.52 | 1.80E-02 |
| WDR60   | WD repeat domain 60                                                      | Extracellular Space | other                    | 1.51 | 2.68E-02 |
| TRIM58  | tripartite motif containing 58                                           | unknown             | other                    | 1.51 | 1.29E-03 |
| SLC39A6 | solute carrier family 39 (zinc transporter), member 6                    | Plasma Membrane     | transporter              | 1.51 | 2.93E-02 |
| GPR126  | G protein-coupled receptor 126                                           | Plasma Membrane     | protein coupled receptor | 1.51 | 2.05E-03 |

|         |                                                                        |                 |                     |      |          |
|---------|------------------------------------------------------------------------|-----------------|---------------------|------|----------|
| FZD10   | frizzled family receptor 10                                            | Plasma Membrane | rotein coupled rece | 1.51 | 2.46E-02 |
| ZNF175  | zinc finger protein 175                                                | Nucleus         | anscription regulat | 1.51 | 1.92E-02 |
| TPI1    | triosephosphate isomerase 1                                            | Cytoplasm       | enzyme              | 1.50 | 1.78E-03 |
| EFR3B   | EFR3 homolog B ( <i>S. cerevisiae</i> )                                | unknown         | other               | 1.50 | 3.52E-02 |
| GAPDH   | glyceraldehyde-3-phosphate dehydrogenase                               | Cytoplasm       | enzyme              | 1.50 | 2.02E-02 |
| DDX17   | DEAD (Asp-Glu-Ala-Asp) box helicase 17                                 | Nucleus         | enzyme              | 1.50 | 3.04E-02 |
| ANXA4   | annexin A4                                                             | Plasma Membrane | other               | 1.50 | 9.08E-04 |
| SLC16A1 | solute carrier family 16, member 1 (monocarboxylic acid transporter 1) | Plasma Membrane | transporter         | 1.50 | 2.02E-02 |
| PTPRU   | protein tyrosine phosphatase, receptor type, U                         | Plasma Membrane | phosphatase         | 1.50 | 2.57E-02 |
| TET3    | tet methylcytosine dioxygenase 3                                       | unknown         | other               | 1.50 | 2.49E-02 |
| MAP7    | microtubule-associated protein 7                                       | Cytoplasm       | other               | 1.50 | 3.26E-02 |
| ERO1L   | ERO1-like ( <i>S. cerevisiae</i> )                                     | Cytoplasm       | enzyme              | 1.50 | 9.62E-04 |
| DOCK4   | dedicator of cytokinesis 4                                             | Plasma Membrane | other               | 1.50 | 3.18E-02 |
| VDR     | vitamin D (1,25- dihydroxyvitamin D3) receptor                         | Nucleus         | ependent nuclear    | 1.49 | 3.43E-02 |
| LITAF   | lipopolysaccharide-induced TNF factor                                  | Nucleus         | anscription regulat | 1.49 | 2.46E-02 |
| TCEAL2  | transcription elongation factor A (SII)-like 2                         | unknown         | other               | 1.49 | 3.72E-02 |
| RAB25   | RAB25, member RAS oncogene family                                      | Cytoplasm       | enzyme              | 1.49 | 1.09E-03 |
| CYP11A1 | cytochrome P450, family 11, subfamily A, polypeptide 1                 | Cytoplasm       | enzyme              | 1.49 | 9.57E-04 |
| SEC23A  | Sec23 homolog A ( <i>S. cerevisiae</i> )                               | Cytoplasm       | transporter         | 1.49 | 3.98E-02 |
| RPS6KA5 | ribosomal protein S6 kinase, 90kDa, polypeptide 5                      | Nucleus         | kinase              | 1.49 | 2.87E-02 |
| LIMD1   | LIM domains containing 1                                               | Nucleus         | anscription regulat | 1.49 | 1.98E-02 |
| SREBF1  | sterol regulatory element binding transcription factor 1               | Nucleus         | anscription regulat | 1.49 | 2.34E-02 |
| KYNU    | kynureninase                                                           | Cytoplasm       | enzyme              | 1.49 | 1.59E-03 |
| CDO1    | cysteine dioxygenase, type I                                           | Cytoplasm       | enzyme              | 1.49 | 8.21E-03 |
| LMAN1   | lectin, mannose-binding, 1                                             | Cytoplasm       | other               | 1.49 | 4.24E-02 |
| NT5E    | 5'-nucleotidase, ecto (CD73)                                           | Plasma Membrane | phosphatase         | 1.48 | 2.19E-02 |
| UBR1    | ubiquitin protein ligase E3 component n-recognin 1                     | Cytoplasm       | enzyme              | 1.48 | 2.05E-02 |

|           |                                                                    |                     |                       |      |          |
|-----------|--------------------------------------------------------------------|---------------------|-----------------------|------|----------|
| HSPB1     | heat shock 27kDa protein 1                                         | Cytoplasm           | other                 | 1.48 | 2.69E-03 |
| EREG      | epiregulin                                                         | Extracellular Space | growth factor         | 1.48 | 3.87E-02 |
| SEMA7A    | semaphorin 7A, GPI membrane anchor (John Milton Hagen blood group) | Plasma Membrane     | other                 | 1.48 | 2.21E-02 |
| NFIL3     | nuclear factor, interleukin 3 regulated                            | Nucleus             | transcription regulat | 1.47 | 3.34E-02 |
| ILVBL     | ilvB (bacterial acetolactate synthase)-like                        | Cytoplasm           | enzyme                | 1.47 | 1.26E-03 |
| FKBP2     | FK506 binding protein 2, 13kDa                                     | Cytoplasm           | enzyme                | 1.47 | 2.30E-02 |
| PHYHIPL   | phytanoyl-CoA 2-hydroxylase interacting protein-like               | Cytoplasm           | other                 | 1.47 | 2.66E-02 |
| ARHGEF4   | Rho guanine nucleotide exchange factor (GEF) 4                     | Cytoplasm           | other                 | 1.47 | 3.14E-02 |
| NEURL     | neuralized homolog (Drosophila)                                    | Nucleus             | other                 | 1.47 | 3.57E-03 |
| PRKD3     | protein kinase D3                                                  | Nucleus             | kinase                | 1.47 | 1.90E-03 |
| CEBPA     | CCAAT/enhancer binding protein (C/EBP), alpha                      | Nucleus             | transcription regulat | 1.47 | 3.85E-03 |
| IL2RG     | interleukin 2 receptor, gamma                                      | Plasma Membrane     | transmembrane recep   | 1.47 | 3.72E-02 |
| PJA1      | praja ring finger 1, E3 ubiquitin protein ligase                   | Cytoplasm           | enzyme                | 1.46 | 7.58E-03 |
| SFXN3     | sideroflexin 3                                                     | Cytoplasm           | transporter           | 1.46 | 2.21E-03 |
| IQGAP1    | IQ motif containing GTPase activating protein 1                    | Cytoplasm           | other                 | 1.46 | 2.46E-03 |
| LGALS8    | lectin, galactoside-binding, soluble, 8                            | Extracellular Space | other                 | 1.46 | 2.10E-03 |
| RFK       | riboflavin kinase                                                  | Cytoplasm           | kinase                | 1.46 | 2.65E-02 |
| SYDE1     | synapse defective 1, Rho GTPase, homolog 1 (C. elegans)            | Cytoplasm           | other                 | 1.46 | 1.95E-03 |
| KLHL8     | kelch-like 8 (Drosophila)                                          | unknown             | other                 | 1.46 | 3.48E-02 |
| FAM120AOS | family with sequence similarity 120A opposite strand               | unknown             | other                 | 1.45 | 2.92E-02 |
| MGA       | MAX gene associated                                                | Nucleus             | transcription regulat | 1.45 | 4.20E-03 |
| MID1      | midline 1 (Opitz/BBB syndrome)                                     | Nucleus             | other                 | 1.45 | 2.49E-03 |
| BCAP29    | B-cell receptor-associated protein 29                              | Cytoplasm           | transporter           | 1.45 | 5.01E-03 |
| TESK2     | testis-specific kinase 2                                           | Nucleus             | kinase                | 1.45 | 3.75E-02 |
| MXI1      | MAX interactor 1                                                   | Nucleus             | transcription regulat | 1.45 | 6.78E-03 |
| SLC7A4    | solute carrier family 7 (orphan transporter), member 4             | Plasma Membrane     | transporter           | 1.45 | 3.21E-02 |



|          |                                                                                        |                     |                       |      |          |
|----------|----------------------------------------------------------------------------------------|---------------------|-----------------------|------|----------|
| GPX3     | glutathione peroxidase 3 (plasma)                                                      | Extracellular Space | enzyme                | 1.45 | 3.58E-02 |
| CLIC3    | chloride intracellular channel 3                                                       | Nucleus             | ion channel           | 1.45 | 8.99E-03 |
| SEMA3G   | sema domain, immunoglobulin domain (Ig), short basic domain, secreted, (semaphorin) 3G | unknown             | other                 | 1.44 | 3.64E-03 |
| SOCS6    | suppressor of cytokine signaling 6                                                     | Cytoplasm           | other                 | 1.44 | 4.85E-02 |
| TCL1B    | T-cell leukemia/lymphoma 1B                                                            | unknown             | other                 | 1.44 | 4.76E-03 |
| C8orf58  | chromosome 8 open reading frame 58                                                     | unknown             | other                 | 1.44 | 3.53E-02 |
| LAMA5    | laminin, alpha 5                                                                       | Extracellular Space | other                 | 1.44 | 3.80E-02 |
| PSG3     | pregnancy specific beta-1-glycoprotein 3                                               | Extracellular Space | other                 | 1.44 | 1.06E-02 |
| ACOT7    | acyl-CoA thioesterase 7                                                                | Cytoplasm           | enzyme                | 1.43 | 4.66E-02 |
| STK24    | serine/threonine kinase 24                                                             | Cytoplasm           | kinase                | 1.43 | 3.03E-02 |
| TRIM14   | tripartite motif containing 14                                                         | Cytoplasm           | other                 | 1.43 | 6.19E-03 |
| LYPLA1   | lysophospholipase I                                                                    | Cytoplasm           | enzyme                | 1.43 | 4.12E-02 |
| AMD1     | adenosylmethionine decarboxylase 1                                                     | Cytoplasm           | enzyme                | 1.43 | 2.44E-03 |
| OCRL     | oculocerebrorenal syndrome of Lowe                                                     | Cytoplasm           | phosphatase           | 1.43 | 3.54E-03 |
| SEPX1    | methionine sulfoxide reductase B1                                                      | unknown             | enzyme                | 1.43 | 4.39E-02 |
| SERPINB9 | serpin peptidase inhibitor, clade B (ovalbumin), member 9                              | Cytoplasm           | other                 | 1.43 | 3.11E-03 |
| MCF2L    | MCF.2 cell line derived transforming sequence-like                                     | Cytoplasm           | other                 | 1.43 | 5.18E-03 |
| ARNT2    | aryl-hydrocarbon receptor nuclear translocator 2                                       | Nucleus             | transcription regulat | 1.42 | 4.11E-03 |
| TM9SF2   | transmembrane 9 superfamily member 2                                                   | Plasma Membrane     | transporter           | 1.42 | 4.36E-03 |
| MTHFD1L  | methylenetetrahydrofolate dehydrogenase (NADP+ dependent) 1-like                       | Cytoplasm           | enzyme                | 1.42 | 3.46E-02 |
| SWAP70   | SWAP switching B-cell complex 70kDa subunit                                            | Cytoplasm           | other                 | 1.42 | 3.09E-02 |
| ELL2     | elongation factor, RNA polymerase II, 2                                                | Nucleus             | transcription regulat | 1.42 | 1.68E-02 |
| ERGIC1   | endoplasmic reticulum-golgi intermediate compartment (ERGIC) 1                         | Cytoplasm           | other                 | 1.42 | 4.55E-02 |
| DUSP5    | dual specificity phosphatase 5                                                         | Nucleus             | phosphatase           | 1.42 | 4.89E-02 |
| PAK3     | p21 protein (Cdc42/Rac)-activated kinase 3                                             | Cytoplasm           | kinase                | 1.42 | 2.85E-02 |

|         |                                                                           |                 |                       |      |          |
|---------|---------------------------------------------------------------------------|-----------------|-----------------------|------|----------|
| GADD45G | growth arrest and DNA-damage-inducible, gamma                             | Nucleus         | other                 | 1.41 | 4.04E-03 |
| CSNK2A2 | casein kinase 2, alpha prime polypeptide                                  | Cytoplasm       | kinase                | 1.41 | 2.67E-03 |
| ARID3A  | AT rich interactive domain 3A (BRIGHT-like)                               | Nucleus         | transcription regulat | 1.41 | 4.74E-03 |
| CYB5R1  | cytochrome b5 reductase 1                                                 | Cytoplasm       | enzyme                | 1.41 | 4.53E-02 |
| BMPR2   | bone morphogenetic protein receptor, type II<br>(serine/threonine kinase) | Plasma Membrane | kinase                | 1.41 | 3.69E-03 |
| EGLN1   | egl nine homolog 1 (C. elegans)                                           | Cytoplasm       | other                 | 1.40 | 2.38E-02 |
| MBD2    | methyl-CpG binding domain protein 2                                       | Nucleus         | transcription regulat | 1.40 | 7.78E-03 |
| ARNT    | aryl hydrocarbon receptor nuclear translocator                            | Nucleus         | transcription regulat | 1.40 | 4.19E-02 |
| PAM     | peptidylglycine alpha-amidating monooxygenase                             | Plasma Membrane | enzyme                | 1.40 | 4.21E-03 |
| ABCA12  | ATP-binding cassette, sub-family A (ABC1), member 12                      | Plasma Membrane | transporter           | 1.75 | 9.86E-03 |
| YIPF4   | Yip1 domain family, member 4                                              | Cytoplasm       | other                 | 1.40 | 1.25E-02 |
| TGOLN2  | trans-golgi network protein 2                                             | Cytoplasm       | other                 | 1.40 | 4.91E-02 |
| MIA3    | melanoma inhibitory activity family, member 3                             | Cytoplasm       | other                 | 1.40 | 3.35E-02 |
| PRRG1   | proline rich Gla (G-carboxyglutamic acid) 1                               | Plasma Membrane | other                 | 1.39 | 4.35E-03 |
| TMEM38B | transmembrane protein 38B                                                 | Nucleus         | ion channel           | 1.39 | 5.33E-03 |
| SLC35F2 | solute carrier family 35, member F2                                       | unknown         | other                 | 1.38 | 7.15E-03 |
| P4HA1   | prolyl 4-hydroxylase, alpha polypeptide I                                 | Cytoplasm       | enzyme                | 1.38 | 5.56E-03 |
| EGFR    | epidermal growth factor receptor                                          | Plasma Membrane | kinase                | 1.37 | 2.97E-02 |
| PDE4D   | phosphodiesterase 4D, cAMP-specific                                       | Cytoplasm       | enzyme                | 1.37 | 8.80E-03 |
| ADRA1A  | adrenoceptor alpha 1A                                                     | Plasma Membrane | protein coupled rece  | 1.37 | 4.67E-02 |
| IER3    | immediate early response 3                                                | Cytoplasm       | other                 | 1.37 | 7.35E-03 |
| TPP1    | tripeptidyl peptidase I                                                   | Cytoplasm       | peptidase             | 1.37 | 6.03E-03 |
| CYB561  | cytochrome b-561                                                          | Cytoplasm       | enzyme                | 1.36 | 9.82E-03 |
| PREP    | prolyl endopeptidase                                                      | Cytoplasm       | peptidase             | 1.36 | 7.78E-03 |
| QKI     | QKI, KH domain containing, RNA binding                                    | Nucleus         | other                 | 1.36 | 4.38E-02 |
| DNM2    | dynamitin 2                                                               | Plasma Membrane | enzyme                | 1.36 | 7.88E-03 |
| CLIC4   | chloride intracellular channel 4                                          | Plasma Membrane | ion channel           | 1.35 | 2.75E-02 |
| JUP     | junction plakoglobin                                                      | Plasma Membrane | other                 | 1.35 | 7.57E-03 |

|           |                                                                                                   |                 |                         |       |          |
|-----------|---------------------------------------------------------------------------------------------------|-----------------|-------------------------|-------|----------|
| CAMSAP1L1 | calmodulin regulated spectrin-associated protein family, member 2                                 | unknown         | other                   | 1.34  | 1.55E-02 |
| LEPROTL1  | leptin receptor overlapping transcript-like 1                                                     | Plasma Membrane | other                   | 1.33  | 1.47E-02 |
| FAM120A   | family with sequence similarity 120A                                                              | Cytoplasm       | other                   | 1.32  | 1.16E-02 |
| MALL      | mal, T-cell differentiation protein-like                                                          | Plasma Membrane | other                   | 1.32  | 1.73E-02 |
| NEDD9     | neural precursor cell expressed, developmentally down-regulated 9                                 | Nucleus         | other                   | 1.31  | 1.82E-02 |
| GATA3     | GATA binding protein 3                                                                            | Nucleus         | transcription regulator | 1.30  | 1.96E-02 |
| PKM2      | pyruvate kinase, muscle                                                                           | unknown         | kinase                  | 1.30  | 1.76E-02 |
| GALE      | UDP-galactose-4-epimerase                                                                         | Cytoplasm       | enzyme                  | 1.30  | 1.79E-02 |
| DCP2      | DCP2 decapping enzyme homolog ( <i>S. cerevisiae</i> )                                            | Nucleus         | enzyme                  | 1.29  | 2.03E-02 |
| CAPN6     | calpain 6                                                                                         | Cytoplasm       | peptidase               | 1.29  | 2.49E-02 |
| ITGA5     | integrin, alpha 5 (fibronectin receptor, alpha polypeptide)                                       | Plasma Membrane | other                   | 1.28  | 2.35E-02 |
| YOD1      | YOD1 OTU deubiquinating enzyme 1 homolog ( <i>S. cerevisiae</i> )                                 | unknown         | enzyme                  | 1.28  | 3.73E-02 |
| SMARCA1   | SWI/SNF related, matrix associated, actin dependent regulator of chromatin, subfamily a, member 1 | Nucleus         | transcription regulator | 1.25  | 3.42E-02 |
| EIF4B     | eukaryotic translation initiation factor 4B                                                       | Cytoplasm       | translation regulator   | 1.23  | 4.92E-02 |
| FBXO9     | F-box protein 9                                                                                   | Cytoplasm       | enzyme                  | -1.29 | 4.90E-02 |
| SYT17     | synaptotagmin XVII                                                                                | Plasma Membrane | other                   | -1.30 | 1.84E-02 |
| SLC23A2   | solute carrier family 23 (nucleobase transporters), member 2                                      | Plasma Membrane | transporter             | -1.33 | 1.30E-02 |
| C20orf3   | chromosome 20 open reading frame 3                                                                | Plasma Membrane | enzyme                  | -1.34 | 8.13E-03 |
| MKL2      | MKL/myocardin-like 2                                                                              | Nucleus         | transcription regulator | -1.34 | 1.39E-02 |
| SLC22A3   | solute carrier family 22 (extraneuronal monoamine transporter), member 3                          | Plasma Membrane | transporter             | -1.34 | 1.53E-02 |
| FAM111A   | family with sequence similarity 111, member A                                                     | unknown         | other                   | -1.34 | 3.25E-02 |
| PTPN3     | protein tyrosine phosphatase, non-receptor type 3                                                 | Cytoplasm       | phosphatase             | -1.36 | 1.11E-02 |
| RAB15     | RAB15, member RAS oncogene family                                                                 | unknown         | other                   | -1.37 | 7.00E-03 |

|         |                                                                    |                     |                         |       |          |
|---------|--------------------------------------------------------------------|---------------------|-------------------------|-------|----------|
| CTBP2   | C-terminal binding protein 2                                       | Nucleus             | transcription regulator | -1.37 | 2.11E-02 |
| CHKA    | choline kinase alpha                                               | Cytoplasm           | kinase                  | -1.37 | 4.26E-02 |
| DLX4    | distal-less homeobox 4                                             | Nucleus             | transcription regulator | -1.37 | 8.76E-03 |
| ANAPC4  | anaphase promoting complex subunit 4                               | Nucleus             | enzyme                  | -1.39 | 4.97E-02 |
| ABCD3   | ATP-binding cassette, sub-family D (ALD), member 3                 | Cytoplasm           | transporter             | -1.39 | 4.65E-02 |
| ANKRD10 | ankyrin repeat domain 10                                           | Nucleus             | transcription regulator | -1.39 | 4.28E-02 |
| ENPP2   | ectonucleotide pyrophosphatase/phosphodiesterase 2                 | Plasma Membrane     | enzyme                  | -1.40 | 4.22E-02 |
| ZNF702P | zinc finger protein 702, pseudogene                                | Nucleus             | other                   | -1.41 | 4.80E-02 |
| F13A1   | coagulation factor XIII, A1 polypeptide                            | Extracellular Space | enzyme                  | -1.41 | 3.65E-02 |
| USP33   | ubiquitin specific peptidase 33                                    | Cytoplasm           | peptidase               | -1.42 | 4.17E-02 |
| VPS13B  | vacuolar protein sorting 13 homolog B (yeast)                      | Nucleus             | transporter             | -1.42 | 4.01E-02 |
| LAMB1   | laminin, beta 1                                                    | Extracellular Space | other                   | -1.42 | 3.27E-03 |
| CNOT10  | CCR4-NOT transcription complex, subunit 10                         | Cytoplasm           | other                   | -1.42 | 4.67E-02 |
| PMAIP1  | phorbol-12-myristate-13-acetate-induced protein 1                  | Cytoplasm           | other                   | -1.43 | 4.41E-02 |
| PDXK    | pyridoxal (pyridoxine, vitamin B6) kinase                          | Cytoplasm           | kinase                  | -1.43 | 4.38E-02 |
| PARP6   | poly (ADP-ribose) polymerase family, member 6                      | unknown             | other                   | -1.44 | 3.97E-03 |
| SRPX2   | sushi-repeat containing protein, X-linked 2                        | Cytoplasm           | other                   | -1.44 | 3.57E-02 |
| UACA    | uveal autoantigen with coiled-coil domains and ankyrin repeats     | Cytoplasm           | other                   | -1.45 | 3.28E-02 |
| SHPRH   | SNF2 histone linker PHD RING helicase, E3 ubiquitin protein ligase | Nucleus             | transcription regulator | -1.45 | 3.65E-02 |
| TMEM139 | transmembrane protein 139                                          | unknown             | other                   | -1.45 | 3.39E-02 |
| TARBP1  | TAR (HIV-1) RNA binding protein 1                                  | Nucleus             | transcription regulator | -1.46 | 2.80E-02 |
| FBN1    | fibrillin 1                                                        | Extracellular Space | other                   | -1.46 | 2.46E-02 |
| TMC1    | transmembrane channel-like 1                                       | Plasma Membrane     | other                   | -1.46 | 3.52E-02 |
| ABAT    | 4-aminobutyrate aminotransferase                                   | Cytoplasm           | enzyme                  | -1.46 | 2.84E-03 |
| DTNB    | dystrobrevin, beta                                                 | Plasma Membrane     | other                   | -1.47 | 2.73E-03 |
| TPCN1   | two pore segment channel 1                                         | Plasma Membrane     | ion channel             | -1.47 | 2.27E-02 |
| ALDH4A1 | aldehyde dehydrogenase 4 family, member A1                         | Cytoplasm           | enzyme                  | -1.47 | 1.45E-03 |

|          |                                                                                                |                     |                         |       |          |
|----------|------------------------------------------------------------------------------------------------|---------------------|-------------------------|-------|----------|
| HSD11B2  | hydroxysteroid (11-beta) dehydrogenase 2                                                       | Cytoplasm           | enzyme                  | -1.47 | 2.92E-02 |
| SOD1     | superoxide dismutase 1, soluble                                                                | Cytoplasm           | enzyme                  | -1.47 | 1.13E-03 |
| HERC2    | HECT and RLD domain containing E3 ubiquitin protein ligase 2                                   | Cytoplasm           | enzyme                  | -1.47 | 3.59E-03 |
| WDR59    | WD repeat domain 59                                                                            | unknown             | transporter             | -1.48 | 2.70E-02 |
| ENPP1    | ectonucleotide pyrophosphatase/phosphodiesterase 1                                             | Plasma Membrane     | enzyme                  | -1.48 | 2.15E-02 |
| LSS      | lanosterol synthase (2,3-oxidosqualene-lanosterol cyclase)                                     | Cytoplasm           | enzyme                  | -1.49 | 3.00E-02 |
| MYO1A    | myosin IA                                                                                      | Cytoplasm           | peptidase               | -1.49 | 3.75E-02 |
| SLAMF1   | signaling lymphocytic activation molecule family member 1                                      | Plasma Membrane     | transmembrane receptor  | -1.50 | 1.45E-03 |
| NEDD4    | neural precursor cell expressed, developmentally down-regulated 4, E3 ubiquitin protein ligase | Cytoplasm           | enzyme                  | -1.50 | 3.28E-02 |
| ZNF555   | zinc finger protein 555                                                                        | unknown             | other                   | -1.50 | 2.67E-02 |
| TMEM168  | transmembrane protein 168                                                                      | Cytoplasm           | other                   | -1.51 | 1.74E-02 |
| KLHL3    | kelch-like 3 (Drosophila)                                                                      | Cytoplasm           | other                   | -1.51 | 2.43E-02 |
| CHD1L    | chromodomain helicase DNA binding protein 1-like                                               | Nucleus             | enzyme                  | -1.51 | 3.25E-02 |
| TIAM1    | T-cell lymphoma invasion and metastasis 1                                                      | Cytoplasm           | other                   | -1.51 | 2.68E-02 |
| LAMA2    | laminin, alpha 2                                                                               | Extracellular Space | other                   | -1.52 | 1.46E-02 |
| ZNF117   | zinc finger protein 117                                                                        | Nucleus             | transcription regulator | -1.52 | 2.06E-02 |
| RANBP17  | RAN binding protein 17                                                                         | Nucleus             | transporter             | -1.52 | 2.51E-02 |
| KIAA1467 | KIAA1467                                                                                       | unknown             | other                   | -1.52 | 3.62E-02 |
| CXorf57  | chromosome X open reading frame 57                                                             | unknown             | other                   | -1.52 | 2.52E-02 |
| SMPDL3A  | sphingomyelin phosphodiesterase, acid-like 3A                                                  | Extracellular Space | enzyme                  | -1.53 | 3.51E-02 |
| GNG11    | guanine nucleotide binding protein (G protein), gamma 11                                       | Plasma Membrane     | enzyme                  | -1.54 | 1.95E-02 |
| F5       | coagulation factor V (proaccelerin, labile factor)                                             | Plasma Membrane     | enzyme                  | -1.54 | 1.31E-02 |
| C6orf70  | chromosome 6 open reading frame 70                                                             | unknown             | other                   | -1.54 | 2.30E-02 |
| CLIC5    | chloride intracellular channel 5                                                               | Cytoplasm           | ion channel             | -1.54 | 1.61E-02 |

|           |                                                             |                     |                       |       |          |
|-----------|-------------------------------------------------------------|---------------------|-----------------------|-------|----------|
| GAP43     | growth associated protein 43                                | Plasma Membrane     | other                 | -1.54 | 1.91E-02 |
| STXBP3    | syntaxin binding protein 3                                  | Plasma Membrane     | transporter           | -1.54 | 4.07E-02 |
| CDK7      | cyclin-dependent kinase 7                                   | Nucleus             | kinase                | -1.54 | 1.33E-02 |
| OLFML3    | olfactomedin-like 3                                         | Extracellular Space | other                 | -1.55 | 2.24E-02 |
| SPON1     | spondin 1, extracellular matrix protein                     | Extracellular Space | other                 | -1.56 | 2.42E-02 |
| CATSPER2  | cation channel, sperm associated 2                          | Plasma Membrane     | ion channel           | -1.56 | 1.61E-02 |
| NBPF3     | neuroblastoma breakpoint family, member 3                   | unknown             | other                 | -1.56 | 1.48E-02 |
| NR2F1     | nuclear receptor subfamily 2, group F, member 1             | Nucleus             | pendent nuclear       | -1.57 | 1.52E-02 |
| AGL       | amylase, alpha-1, 6-glucosidase, 4-alpha-glucanotransferase | Cytoplasm           | enzyme                | -1.57 | 9.89E-03 |
| FBN2      | fibrillin 2                                                 | Extracellular Space | other                 | -1.57 | 9.13E-03 |
| ANKRD20A2 | ankyrin repeat domain 20 family, member A3                  | Plasma Membrane     | other                 | -1.59 | 9.54E-03 |
| FAM164A   | zinc finger, C2HC-type containing 1A                        | unknown             | other                 | -1.59 | 9.12E-03 |
| SRPX      | sushi-repeat containing protein, X-linked                   | Cytoplasm           | other                 | -1.59 | 1.25E-02 |
| BMX       | BMX non-receptor tyrosine kinase                            | Cytoplasm           | kinase                | -1.60 | 1.24E-02 |
| SPINK5    | serine peptidase inhibitor, Kazal type 5                    | Extracellular Space | other                 | -1.61 | 1.01E-02 |
| HLF       | hepatic leukemia factor                                     | Nucleus             | transcription regulat | -1.61 | 6.74E-03 |
| SLC27A2   | solute carrier family 27 (fatty acid transporter), member 2 | Cytoplasm           | transporter           | -1.61 | 1.90E-02 |
| GSTA3     | glutathione S-transferase alpha 3                           | Cytoplasm           | enzyme                | -1.62 | 6.89E-03 |
| ABCG2     | ATP-binding cassette, sub-family G (WHITE), member 2        | Plasma Membrane     | transporter           | -1.62 | 6.60E-03 |
| CPAMD8    | C3 and PZP-like, alpha-2-macroglobulin domain containing 8  | Extracellular Space | other                 | -1.62 | 1.82E-02 |
| MTA1      | metastasis associated 1                                     | Nucleus             | transcription regulat | -1.63 | 4.45E-02 |
| WNT2      | wingless-type MMTV integration site family member 2         | Extracellular Space | cytokine              | -1.63 | 7.81E-03 |
| DTYMK     | deoxythymidylate kinase (thymidylate kinase)                | Cytoplasm           | kinase                | -1.63 | 1.67E-02 |
| ABCC2     | ATP-binding cassette, sub-family C (CFTR/MRP), member 2     | Plasma Membrane     | transporter           | -1.64 | 1.38E-02 |
| OSBPL3    | oxysterol binding protein-like 3                            | Cytoplasm           | other                 | -1.64 | 6.94E-03 |
| SLC25A35  | solute carrier family 25, member 35                         | Cytoplasm           | other                 | -1.65 | 7.34E-03 |

|          |                                                                                                      |                     |                       |       |          |
|----------|------------------------------------------------------------------------------------------------------|---------------------|-----------------------|-------|----------|
| AGPAT5   | 1-acylglycerol-3-phosphate O-acyltransferase 5<br>(lysophosphatidic acid acyltransferase, epsilon)   | Cytoplasm           | enzyme                | -1.68 | 2.99E-02 |
| TRPV6    | transient receptor potential cation channel, subfamily<br>V, member 6                                | Plasma Membrane     | ion channel           | -1.68 | 3.90E-04 |
| CCDC50   | coiled-coil domain containing 50                                                                     | Cytoplasm           | other                 | -1.69 | 6.43E-03 |
| KIF27    | kinesin family member 27                                                                             | Cytoplasm           | other                 | -1.70 | 1.57E-02 |
| CSHL1    | chorionic somatomammotropin hormone-like 1                                                           | Nucleus             | other                 | -1.70 | 2.13E-02 |
| AFF3     | AF4/FMR2 family, member 3                                                                            | Nucleus             | transcription regulat | -1.70 | 1.43E-02 |
| GH1      | growth hormone 1                                                                                     | Extracellular Space | growth factor         | -1.71 | 4.02E-02 |
| RUNDC2A  | sorting nexin 29                                                                                     | unknown             | other                 | -1.72 | 3.91E-02 |
| COL21A1  | collagen, type XXI, alpha 1                                                                          | Extracellular Space | other                 | -1.72 | 4.12E-03 |
| ADCY7    | adenylate cyclase 7                                                                                  | Plasma Membrane     | enzyme                | -1.72 | 5.16E-05 |
| NEB      | nebulin                                                                                              | unknown             | other                 | -1.72 | 4.52E-03 |
| ICA1     | islet cell autoantigen 1, 69kDa                                                                      | Cytoplasm           | other                 | -1.73 | 4.74E-03 |
| GPR155   | G protein-coupled receptor 155                                                                       | Plasma Membrane     | rotein coupled rece   | -1.73 | 3.32E-03 |
| PTPRD    | protein tyrosine phosphatase, receptor type, D                                                       | Plasma Membrane     | phosphatase           | -1.73 | 5.31E-03 |
| RBBP6    | retinoblastoma binding protein 6                                                                     | Nucleus             | enzyme                | -1.73 | 2.09E-02 |
| FERMT1   | fermitin family member 1                                                                             | Plasma Membrane     | other                 | -1.74 | 4.86E-02 |
| SLC25A27 | solute carrier family 25, member 27                                                                  | Cytoplasm           | transporter           | -1.75 | 3.28E-03 |
| HECW2    | HECT, C2 and WW domain containing E3 ubiquitin<br>protein ligase 2                                   | Extracellular Space | enzyme                | -1.75 | 3.56E-03 |
| BNC2     | basonuclin 2                                                                                         | Nucleus             | other                 | -1.75 | 3.17E-03 |
| ZBTB20   | zinc finger and BTB domain containing 20                                                             | Nucleus             | other                 | -1.78 | 2.08E-02 |
| MYH3     | myosin, heavy chain 3, skeletal muscle, embryonic                                                    | Cytoplasm           | enzyme                | -1.78 | 5.00E-02 |
| TRIM45   | tripartite motif containing 45                                                                       | Cytoplasm           | other                 | -1.79 | 2.06E-03 |
| CCL13    | chemokine (C-C motif) ligand 13                                                                      | Extracellular Space | cytokine              | -1.79 | 4.44E-03 |
| GALNT11  | UDP-N-acetyl-alpha-D-galactosamine:polypeptide N-<br>acetylgalactosaminyltransferase 11 (GalNAc-T11) | Cytoplasm           | enzyme                | -1.80 | 1.62E-03 |

|          |                                                           |                     |                         |       |          |
|----------|-----------------------------------------------------------|---------------------|-------------------------|-------|----------|
| GREB1    | growth regulation by estrogen in breast cancer 1          | Cytoplasm           | other                   | -1.81 | 6.48E-03 |
| HSD17B1  | hydroxysteroid (17-beta) dehydrogenase 1                  | Cytoplasm           | enzyme                  | -1.82 | 2.89E-05 |
| NAV3     | neuron navigator 3                                        | Nucleus             | other                   | -1.83 | 4.86E-02 |
| C8orf46  | chromosome 8 open reading frame 46                        | unknown             | other                   | -1.84 | 3.83E-02 |
| LONRF2   | LON peptidase N-terminal domain and ring finger 2         | unknown             | other                   | -1.85 | 1.23E-03 |
| APLN     | apelin                                                    | Extracellular Space | other                   | -1.86 | 1.05E-03 |
| SULF1    | sulfatase 1                                               | Cytoplasm           | enzyme                  | -1.88 | 2.50E-03 |
| SH3TC2   | SH3 domain and tetratricopeptide repeats 2                | unknown             | other                   | -1.92 | 1.62E-05 |
| COASY    | CoA synthase                                              | Cytoplasm           | kinase                  | -1.92 | 2.61E-05 |
| C9orf93  | coiled-coil domain containing 171                         | unknown             | other                   | -1.96 | 1.90E-02 |
| LEPREL1  | leprecan-like 1                                           | unknown             | enzyme                  | -2.00 | 3.79E-06 |
| ACOXL    | acyl-CoA oxidase-like                                     | unknown             | enzyme                  | -2.01 | 3.51E-05 |
| TMEM136  | transmembrane protein 136                                 | unknown             | other                   | -2.02 | 3.80E-04 |
| ADAMTS6  | ADAM metallopeptidase with thrombospondin type 1 motif, 6 | Extracellular Space | peptidase               | -2.02 | 5.14E-04 |
| ZNF83    | zinc finger protein 83                                    | Nucleus             | transcription regulator | -2.10 | 8.13E-03 |
| PCDH17   | protocadherin 17                                          | unknown             | other                   | -2.17 | 3.37E-04 |
| CFH      | complement factor H                                       | Extracellular Space | other                   | -2.18 | 1.53E-04 |
| CFHR1    | complement factor H-related 1                             | Extracellular Space | other                   | -2.30 | 9.78E-04 |
| ZNF554   | zinc finger protein 554                                   | unknown             | other                   | -2.37 | 3.88E-05 |
| C21orf81 | ankyrin repeat domain 20 family, member A11, pseudogene   | unknown             | other                   | -2.50 | 1.07E-03 |
| CORO6    | coronin 6                                                 | Extracellular Space | other                   | -2.55 | 1.93E-03 |
| MMP1     | matrix metallopeptidase 1 (interstitial collagenase)      | Extracellular Space | peptidase               | -2.59 | 2.67E-04 |
| CCK      | cholecystokinin                                           | Extracellular Space | other                   | -2.62 | 6.27E-05 |
| GABRE    | gamma-aminobutyric acid (GABA) A receptor, epsilon        | Plasma Membrane     | ion channel             | -2.64 | 2.07E-05 |
| DEFA3    | defensin, alpha 1                                         | Cytoplasm           | other                   | -3.08 | 9.10E-06 |
